# Supplementary material for: Effect of hemoglobin, triglyceride, and urea in different concentrations on compatibility between methods used in HbA 1c measurement
Source: publisher site journal article supplement (doi:10.1515/tjb-2021-0166), 2022-06-10
Supplement: Supplementary file 1 [file j_tjb-2021-0166_suppl.docx]

**Table 1.** The performance of Trinity against Roche method at different levels of HbA1c.

| Parameter Estimates | **Passing-Bablok Regression** | | **Agreement Statistics** | |
| --- | --- | --- | --- | --- |
| ***β0*** | ***β1*** | **ICC** | **CCC** |
| **Roche-Trinity (HbA1c<6.5%, 48 mmol/mol) n=166** |  |  |  |  |
| Coefficient | -0.1000 | 1.0000 | 0.8210 | 0.8132 |
| 95% CI | -0.5308 to 0.3308 | 0.9231 to 1.0769 | 0.7632 to 0.8657 | 0.7553 to 0.8586 |
| Interpretation | No constant error | No proportional error | Good agreement | Good agreement |
| **Roche-Trinity (HbA1c 6.5-9.9%, 48-85 mmol/mol) n=199** |  |  |  |  |
| Coefficient | -0.2000 | 1.0000 | 0.9686 | 0.9576 |
| 95% CI | -0.4500 to -0.200 | 1.0000 to 1.0357 | 0.9590 to 0.9761 | 0.9450 to 0.9673 |
| Interpretation | **Constant error** | No proportional error | Very good agreement | Very good agreement |
| **Roche-Trinity (HbA1c≥10%, 86 mmol/mol) n=47** |  |  |  |  |
| Coefficient | -3.1274 | 1.2817 | 0.9425 | 0.9185 |
| 95% CI | -5.4000 to -1.3826 | 1.1304 to 1.5000 | 0.8972 to 0.9682 | 0.8658 to 0.9511 |
| Interpretation | **Constant error** | **Proportional error** | Very good agreement | Very good agreement |
| **Roche-Trinity (total) n=412** |  |  |  |  |
| Coefficient | -0.1000 | 1.0000 | 0.9867 | 0.9850 |
| 95% CI | -0.1000 to -0.1000 | 1.000  to 1.000 | 0.9839 to 0.9890 | 0.9819 to 0.9876 |
| Interpretation | No constant error | No proportional error | Very good agreement | Very good agreement |
| *Strength of agreement: <0.20 poor; 0.21-0.40 fair; 0.41-0.60 moderate; 0.61-0.80 good; 0.81-1.00 very good* | | | | |

**Table 2.** Comparison of bias% at different TG, BUN, Hb and glucose levels.

|  | **Bias%** | **p** |
| --- | --- | --- |
| **TG**  <200 mg/dL (2.26 mmol/L)  200-400 mg/dL (2.26-4.51 mmol/L)  >400 mg/dL (>4.52 mmol/L) | -1.66 (-4.53-1.36)  -1.85 (-5.02-1.70)  0.00 (-1.86-2.99) | 0.207 |
| **BUN**  ≤20mg/dL (≤7.1 mmol/L)  >20mg/dL (>7.1 mmol/L) | -1.85 (-5.00-1.48)  -3.05 (-5.43--0.30) | 0.389 |
| **Hb**  M<14, F<12 g/dL  (M<8.67, F<7.45 mmol/L)  M≥14, F≥12 g/dL  (M≥8.67, F≥7.45 mmol/L) | -2.77 (-6.55-1.56)  -1.42 (-3.93-1.51) | 0.070 |
| **Glucose**  <126 mg/dL (<7 mmol/L)  ≥126 mg/dL (≥7 mmol/L) | -1.88 (-4.76-1.73)  -1.36 (-4.16-1.44) | 0.848 |
| *M: Male, F: Female* | | |
